# Supplementary material for: A Novel Bufalin Derivative Exhibited Stronger Apoptosis-Inducing Effect than Bufalin in A549 Lung Cancer Cells and Lower Acute Toxicity in Mice
Source: PubMed Central journal article supplement (PMC4961401; doi:10.1371/journal.pone.0159789), 2016-07-26
Supplement: pone.0159789.s003.pdf [file pone.0159789.s003.pdf]

**S1 Table.** Sequence of primers used in RT-PCR analysis

| Gene   | Sequence (5'-3')                                                 |
|--------|------------------------------------------------------------------|
| ATP1A1 | Forward: CTGTGGATTGGAGCGATTCTT<br>Reverse: TTACAACGGCTGATAGCACCA |
| ATP1A2 | Forward: CACCACCGAAGATCAGTCTGG<br>Reverse: CGCTTAGACACGGAGATGTTC |
| ATP1A3 | Forward: AAGGAGGTGGCTATGACAGAG<br>Reverse: GTGAGTGCGTTAGGCCCAT   |
