# Supplementary material for: A Novel Bufalin Derivative Exhibited Stronger Apoptosis-Inducing Effect than Bufalin in A549 Lung Cancer Cells and Lower Acute Toxicity in Mice
Source: PubMed Central journal article supplement (PMC4961401; doi:10.1371/journal.pone.0159789), 2016-07-26
Supplement: pone.0159789.s004.pdf [file pone.0159789.s004.pdf]

**S2 Table.** IC50 values of BF and BF211 (72 h treatment) in inhibiting proliferation of human lung cancer cell lines

| Cell lines | IC50 values (nM) |              |
|------------|------------------|--------------|
|            | BF               | BF211        |
| NCI-H460   | 114.29 ± 11.19   | 68.00 ± 6.91 |
| NCI-H522   | 98.69 ± 2.76     | 48.29 ± 0.69 |
| NCI-H1299  | 88.31 ± 11.87    | 40.08 ± 4.04 |
